# Supplementary material
Source: ML conference proceedings conference paper supplement (https://openreview.net/forum?id=DEhSlPNviW)
Supplement: supplementary_material [file attachment]

## A APPENDIX

**Definition 5** (HTO inequality). *Let  $\mathbf{x}, \mathbf{y} \in \mathbb{R}^n$  such that  $\mathbf{y} \in H_s(\mathbf{x})$ . Then, according to Definition 3, the following for any  $\mathcal{I}_s^{\mathbf{y}}$  is called HT operator inequality:*

$$|x_i| \leq |x_j| \quad \forall \quad i \in (\mathcal{I}_s^{\mathbf{y}})^c \text{ and } j \in \mathcal{I}_s^{\mathbf{y}}. \quad (11)$$

**Definition 6** (The IHT algorithm). *The IHT scheme in Algorithm 1 is an iterative process that applies the HT operator on the updated vector found by the gradient descent algorithm.*

**Definition 7** (Basic stationary point). *When  $\mathbf{x}^*$  is a local minimizer of Problem (2), then  $\nabla_{\mathcal{I}_s^*} f(\mathbf{x}^*) = 0$  when  $\|\mathbf{x}^*\|_0 = s$  or  $\nabla f(\mathbf{x}^*) = 0$  when  $\|\mathbf{x}^*\|_0 < s$ , Beck & Eldar (2013). Every point satisfying these conditions is called basic stationary point of Problem (2). Points with the aforementioned property are called basic feasible points in Beck & Eldar (2013).*

### A.1 PROOF OF CLAIM 1:

*Proof.* In this part we show why the hard thresholding operator keeps the  $s$  largest entries of its input in absolute value sense. First, notice that one can write  $\|\mathbf{z} - \mathbf{x}\|_2^2 = \sum_{i=1}^n (z_i - x_i)^2$ . Without loss of generality suppose that  $\mathbf{x}$  is given such that its entries are in a descending order in terms of absolute value. Then one can write the following:

$$\sum_{i=1}^n (z_i - x_i)^2 = \sum_{j=1}^s (z_j - x_j)^2 + \sum_{i=s+1}^n (z_i - x_i)^2.$$

The optimal solution should have  $n - s$  entries whose values are zero. Let  $\mathbf{z}^*$  be a vector such that the first  $s$  entries of  $\mathbf{z}^*$  be the  $s$  largest entries of  $\mathbf{x}$  in absolute value sense and the rest be zero. Then one can get the following:

$$\sum_{i=1}^n (z_i^* - x_i)^2 = \sum_{i=s+1}^n x_i^2.$$

Because  $\sum_{i=s+1}^n x_i^2$  is the sum of  $n - s$  smallest entries of  $\mathbf{x}$ , the objective value in (5) would be minimized. Any choice other than a vector  $\mathbf{z}^*$  that has the largest  $s$  element of  $\mathbf{x}$  and zero elsewhere,  $\sum_{i=s+1}^n x_i^2$  cannot lead to the minimum of the function value. Hence,  $\mathbf{z}^* = H_s(\mathbf{x})$  keeps the  $s$  largest entries of  $\mathbf{x}$  in absolute value and zero out the rest.  $\square$

### A.2 PROOF OF THEOREM 1:

*Proof.* Fix  $0 < \gamma \leq \frac{1}{L_s}$ ,  $\mathcal{I}_s^{\mathbf{x}}$  for a given  $\mathbf{x} \in C_s$ ,  $\mathbf{y} \in H_s(\mathbf{x} - \gamma \nabla f(\mathbf{x}))$  and  $\mathcal{I}_s^{\mathbf{y}}$ . Let  $\mathcal{I} := \mathcal{I}_s^{\mathbf{x}} \cup \mathcal{I}_s^{\mathbf{y}}$ . Clearly,  $\mathbf{y}_{\mathcal{I}^c} = \mathbf{x}_{\mathcal{I}^c} = 0$ ,  $\mathbf{x}_{\mathcal{I} \setminus \mathcal{I}_s^{\mathbf{x}}} = 0$ ,  $\mathbf{y}_{\mathcal{I} \setminus \mathcal{I}_s^{\mathbf{y}}} = 0$ , and  $\mathbf{y}_{\mathcal{I}_s^{\mathbf{y}}} = (\mathbf{x} - \gamma \nabla f(\mathbf{x}))_{\mathcal{I}_s^{\mathbf{y}}} = \mathbf{x}_{\mathcal{I}_s^{\mathbf{y}}} - \gamma \nabla_{\mathcal{I}_s^{\mathbf{y}}} f(\mathbf{x})$ . This shows that

$$(\mathbf{y} - \mathbf{x})_{\mathcal{I}^c} = 0, \quad (\mathbf{y} - \mathbf{x})_{\mathcal{I} \setminus \mathcal{I}_s^{\mathbf{y}}} = -\mathbf{x}_{\mathcal{I} \setminus \mathcal{I}_s^{\mathbf{y}}}, \quad (\mathbf{y} - \mathbf{x})_{\mathcal{I}_s^{\mathbf{y}}} = -\gamma \nabla_{\mathcal{I}_s^{\mathbf{y}}} f(\mathbf{x}).$$

Since  $f(\mathbf{x})$  is  $L_s$ -RSS and both  $\|\mathbf{x}\|_0 \leq s$  and  $\|\mathbf{y}\|_0 \leq s$ , one can write (3). Then, notice that both the inner product and the norm squared in (3) can be partitioned into two terms based as the following:

$$\begin{aligned} f(\mathbf{y}) &\leq f(\mathbf{x}) + \langle \nabla f(\mathbf{x}), \mathbf{y} - \mathbf{x} \rangle + \frac{L_s}{2} \|\mathbf{y} - \mathbf{x}\|_2^2 \\ &\leq f(\mathbf{x}) + \langle \nabla_{\mathcal{I}_s^{\mathbf{y}}} f(\mathbf{x}), (\mathbf{y} - \mathbf{x})_{\mathcal{I}_s^{\mathbf{y}}} \rangle + \frac{L_s}{2} \|(\mathbf{y} - \mathbf{x})_{\mathcal{I}_s^{\mathbf{y}}}\|_2^2 + \langle \nabla_{\mathcal{I} \setminus \mathcal{I}_s^{\mathbf{y}}} f(\mathbf{x}), (\mathbf{y} - \mathbf{x})_{\mathcal{I} \setminus \mathcal{I}_s^{\mathbf{y}}} \rangle + \frac{L_s}{2} \|(\mathbf{y} - \mathbf{x})_{\mathcal{I} \setminus \mathcal{I}_s^{\mathbf{y}}}\|_2^2 \\ &\leq f(\mathbf{x}) - \gamma \langle \nabla_{\mathcal{I}_s^{\mathbf{y}}} f(\mathbf{x}), \nabla_{\mathcal{I}_s^{\mathbf{y}}} f(\mathbf{x}) \rangle + \frac{L_s}{2} \|\gamma \nabla_{\mathcal{I}_s^{\mathbf{y}}} f(\mathbf{x})\|_2^2 - \langle \nabla_{\mathcal{I} \setminus \mathcal{I}_s^{\mathbf{y}}} f(\mathbf{x}), \mathbf{x}_{\mathcal{I} \setminus \mathcal{I}_s^{\mathbf{y}}} \rangle + \frac{L_s}{2} \|\mathbf{x}_{\mathcal{I} \setminus \mathcal{I}_s^{\mathbf{y}}}\|_2^2 \\ &\leq f(\mathbf{x}) - \gamma \left(1 - \frac{\gamma L_s}{2}\right) \|\nabla_{\mathcal{I}_s^{\mathbf{y}}} f(\mathbf{x})\|_2^2 - \langle \nabla_{\mathcal{I} \setminus \mathcal{I}_s^{\mathbf{y}}} f(\mathbf{x}), \mathbf{x}_{\mathcal{I} \setminus \mathcal{I}_s^{\mathbf{y}}} \rangle + \frac{L_s}{2} \|\mathbf{x}_{\mathcal{I} \setminus \mathcal{I}_s^{\mathbf{y}}}\|_2^2 \end{aligned} \quad (12)$$

Since  $0 < \gamma \leq \frac{1}{L_s}$ , we have  $0 < L_s \leq \frac{1}{\gamma}$ . Hence, one can write the following:

$$\begin{aligned}
& -\langle \nabla_{\mathcal{I} \setminus \mathcal{I}_s^y} f(\mathbf{x}), \mathbf{x}_{\mathcal{I} \setminus \mathcal{I}_s^y} \rangle + \frac{L_s}{2} \|\mathbf{x}_{\mathcal{I} \setminus \mathcal{I}_s^y}\|_2^2 \\
& \leq -\langle \nabla_{\mathcal{I} \setminus \mathcal{I}_s^y} f(\mathbf{x}), \mathbf{x}_{\mathcal{I} \setminus \mathcal{I}_s^y} \rangle + \frac{1}{2\gamma} \|\mathbf{x}_{\mathcal{I} \setminus \mathcal{I}_s^y}\|_2^2 \\
& = \frac{1}{2\gamma} \left( \|\mathbf{x}_{\mathcal{I} \setminus \mathcal{I}_s^y}\|_2^2 - 2\gamma \langle \nabla_{\mathcal{I} \setminus \mathcal{I}_s^y} f(\mathbf{x}), \mathbf{x}_{\mathcal{I} \setminus \mathcal{I}_s^y} \rangle + \gamma^2 \|\nabla_{\mathcal{I} \setminus \mathcal{I}_s^y} f(\mathbf{x})\|_2^2 \right) - \frac{\gamma}{2} \|\nabla_{\mathcal{I} \setminus \mathcal{I}_s^y} f(\mathbf{x})\|_2^2 \\
& = \frac{1}{2\gamma} \|\mathbf{x}_{\mathcal{I} \setminus \mathcal{I}_s^y} - \gamma \nabla_{\mathcal{I} \setminus \mathcal{I}_s^y} f(\mathbf{x})\|_2^2 - \frac{\gamma}{2} \|\nabla_{\mathcal{I} \setminus \mathcal{I}_s^y} f(\mathbf{x})\|_2^2.
\end{aligned}$$

We claim that

$$\|\mathbf{x}_{\mathcal{I} \setminus \mathcal{I}_s^y} - \gamma \nabla_{\mathcal{I} \setminus \mathcal{I}_s^y} f(\mathbf{x})\|_2^2 \leq \|\gamma \nabla_{\mathcal{I} \setminus \mathcal{I}_s^x} f(\mathbf{x})\|_2^2 = \gamma^2 \|\nabla_{\mathcal{I} \setminus \mathcal{I}_s^x} f(\mathbf{x})\|_2^2. \quad (13)$$

To show this claim, recall that from the definition of hard thresholding inequality in Definition 5, one can write the following for any  $\mathcal{I}_s^y$ :

$|\mathbf{x}_q - \gamma \nabla_q f(\mathbf{x})| \leq |\mathbf{x}_p - \gamma \nabla_p f(\mathbf{x})|, \quad \forall q \in (\mathcal{I}_s^y)^c, \quad \forall p \in \mathcal{I}_s^y$   
Also,  $\mathcal{I} \setminus \mathcal{I}_s^y \subseteq (\mathcal{I}_s^y)^c$  and  $(\mathcal{I} \setminus \mathcal{I}_s^x) \subseteq \mathcal{I}_s^y$ . Therefore, according to the hard thresholding operator for all  $i \in \mathcal{I} \setminus \mathcal{I}_s^y$  and for all  $j \in \mathcal{I} \setminus \mathcal{I}_s^x$  we have the following:

$$\begin{aligned}
|(\mathbf{x}_{\mathcal{I} \setminus \mathcal{I}_s^y} - \gamma \nabla_{\mathcal{I} \setminus \mathcal{I}_s^y} f(\mathbf{x}))_i| & \leq |(\mathbf{x}_{\mathcal{I} \setminus \mathcal{I}_s^x} - \gamma \nabla_{\mathcal{I} \setminus \mathcal{I}_s^x} f(\mathbf{x}))_j| \\
& = |(-\gamma \nabla_{\mathcal{I} \setminus \mathcal{I}_s^x} f(\mathbf{x}))_j|
\end{aligned} \quad (14)$$

where the last inequality follows from the fact that for every entry with index  $j$  in  $\mathcal{I} \setminus \mathcal{I}_s^x$ , the corresponding value is zero. Also, since the number of elements in  $|\mathcal{I}_s^x| = |\mathcal{I}_s^y|$ , one can write the following:

$$|\mathcal{I} \setminus \mathcal{I}_s^y| = |\mathcal{I}_s^x| - |\mathcal{I}_s^x \cap \mathcal{I}_s^y| = |\mathcal{I}_s^y| - |\mathcal{I}_s^x \cap \mathcal{I}_s^y| = |\mathcal{I} \setminus \mathcal{I}_s^x| \quad (15)$$

which implies that the numbers of elements in  $\mathcal{I} \setminus \mathcal{I}_s^y$  and  $\mathcal{I} \setminus \mathcal{I}_s^x$  are the same. Hence, one can square each inequality in (14) to get the  $\|\mathbf{x}_{\mathcal{I} \setminus \mathcal{I}_s^y} - \gamma \nabla_{\mathcal{I} \setminus \mathcal{I}_s^y} f(\mathbf{x})\|_2^2 \leq \|\gamma \nabla_{\mathcal{I} \setminus \mathcal{I}_s^x} f(\mathbf{x})\|_2^2$ .

Using (13) one can find an upper bound on the right hand side of (12) as follows:

$$f(\mathbf{y}) \leq f(\mathbf{x}) - \gamma(1 - \frac{\gamma L_s}{2}) \|\nabla_{\mathcal{I}_s^y} f(\mathbf{x})\|_2^2 + \frac{1}{2\gamma} \gamma^2 \|\gamma \nabla_{\mathcal{I} \setminus \mathcal{I}_s^x} f(\mathbf{x})\|_2^2 - \frac{\gamma}{2} \|\nabla_{\mathcal{I} \setminus \mathcal{I}_s^y} f(\mathbf{x})\|_2^2. \quad (16)$$

Notice that  $\mathcal{I}_s^y$  is the disjoint union of  $\mathcal{I}_s^x \cap \mathcal{I}_s^y$  and  $\mathcal{I} \setminus \mathcal{I}_s^x$ , i.e.,  $\mathcal{I}_s^y = (\mathcal{I}_s^x \cap \mathcal{I}_s^y) \cup (\mathcal{I} \setminus \mathcal{I}_s^x)$ . Therefore,  $\|\nabla_{\mathcal{I}_s^y} f(\mathbf{x})\|_2^2 = \|\nabla_{\mathcal{I}_s^x \cap \mathcal{I}_s^y} f(\mathbf{x})\|_2^2 + \|\nabla_{\mathcal{I} \setminus \mathcal{I}_s^x} f(\mathbf{x})\|_2^2$ . Substituting the right-hand side into prior inequality yields: By adding some positive values to the right hand side of (16) we have:

$$\begin{aligned}
f(\mathbf{y}) & \leq f(\mathbf{x}) - \gamma \left( \frac{1}{2} - \frac{\gamma L_s}{2} \right) \|\nabla_{\mathcal{I} \setminus \mathcal{I}_s^x} f(\mathbf{x})\|_2^2 - \gamma \left( 1 - \frac{\gamma L_s}{2} \right) \|\nabla_{\mathcal{I}_s^x \cap \mathcal{I}_s^y} f(\mathbf{x})\|_2^2 - \frac{\gamma}{2} \|\nabla_{\mathcal{I} \setminus \mathcal{I}_s^y} f(\mathbf{x})\|_2^2 \\
& \leq f(\mathbf{x}) - \gamma \left( \frac{1}{2} - \frac{\gamma L_s}{2} \right) \left( \|\nabla_{\mathcal{I} \setminus \mathcal{I}_s^x} f(\mathbf{x})\|_2^2 + \|\nabla_{\mathcal{I}_s^x \cap \mathcal{I}_s^y} f(\mathbf{x})\|_2^2 + \|\nabla_{\mathcal{I} \setminus \mathcal{I}_s^y} f(\mathbf{x})\|_2^2 \right) \\
& = f(\mathbf{x}) - \frac{\gamma}{2} (1 - \gamma L_s) \|\nabla_{\mathcal{I}_s^x \cup \mathcal{I}_s^y} f(\mathbf{x})\|_2^2
\end{aligned}$$

where the last equations follows from the fact that  $\mathcal{I} = \mathcal{I}_s^x \cup \mathcal{I}_s^y$  is the disjoint union of  $\mathcal{I} \setminus \mathcal{I}_s^x$ ,  $\mathcal{I}_s^x \cap \mathcal{I}_s^y$ , and  $\mathcal{I} \setminus \mathcal{I}_s^y$ .  $\square$

### A.3 PROOF OF COROLLARY 1:

*Proof.* Since  $\mathbf{y}_{\mathcal{I}^c} = \mathbf{x}_{\mathcal{I}^c} = 0$  and  $\mathcal{I}$  is the disjoint union of  $\mathcal{I} \setminus \mathcal{I}_s^y$  and  $\mathcal{I}_s^y$ , one can write the following:

$$\begin{aligned}
\|\mathbf{y} - \mathbf{x}\|_2^2 & = \|\mathbf{y}_{\mathcal{I}^c} - \mathbf{x}_{\mathcal{I}^c}\|_2^2 + \|\mathbf{y}_{\mathcal{I} \setminus \mathcal{I}_s^x} - \mathbf{x}_{\mathcal{I} \setminus \mathcal{I}_s^x}\|_2^2 + \|\mathbf{y}_{\mathcal{I} \setminus \mathcal{I}_s^y} - \mathbf{x}_{\mathcal{I} \setminus \mathcal{I}_s^y}\|_2^2 + \|\mathbf{y}_{\mathcal{I}_s^x \cap \mathcal{I}_s^y} - \mathbf{x}_{\mathcal{I}_s^x \cap \mathcal{I}_s^y}\|_2^2 \\
& = \|\mathbf{y}_{\mathcal{I} \setminus \mathcal{I}_s^y} - \mathbf{x}_{\mathcal{I} \setminus \mathcal{I}_s^y}\|_2^2 + \|\mathbf{y}_{\mathcal{I}_s^y} - \mathbf{x}_{\mathcal{I}_s^y}\|_2^2 \\
& = \|\mathbf{x}_{\mathcal{I} \setminus \mathcal{I}_s^y}\|_2^2 + \|\mathbf{y}_{\mathcal{I}_s^y} - \mathbf{x}_{\mathcal{I}_s^y}\|_2^2 \\
& = \|\mathbf{x}_{\mathcal{I} \setminus \mathcal{I}_s^y}\|_2^2 + \|\gamma \nabla_{\mathcal{I}_s^y} f(\mathbf{x})\|_2^2.
\end{aligned} \quad (17)$$

By applying the reverse triangle inequality on Inequality (13) one can bound  $\|\mathbf{x}_{\mathcal{I} \setminus \mathcal{I}_s^y}\|_2^2$  as follows:

$$\|\mathbf{x}_{\mathcal{I} \setminus \mathcal{I}_s^y}\|_2 - \|\gamma \nabla_{\mathcal{I} \setminus \mathcal{I}_s^y} f(\mathbf{x})\|_2 \leq \|\gamma \nabla_{\mathcal{I} \setminus \mathcal{I}_s^x} f(\mathbf{x})\|_2.$$

Hence, one can write the following:

$$\|\mathbf{x}_{\mathcal{I} \setminus \mathcal{I}_s^y}\|_2^2 \leq (\|\gamma \nabla_{\mathcal{I} \setminus \mathcal{I}_s^y} f(\mathbf{x})\|_2 + \|\gamma \nabla_{\mathcal{I} \setminus \mathcal{I}_s^x} f(\mathbf{x})\|_2)^2 \leq 2\|\gamma \nabla_{\mathcal{I} \setminus \mathcal{I}_s^y} f(\mathbf{x})\|_2^2 + 2\|\gamma \nabla_{\mathcal{I} \setminus \mathcal{I}_s^x} f(\mathbf{x})\|_2^2$$

By plugging the above upper bound in place of  $\|\mathbf{x}_{\mathcal{I} \setminus \mathcal{I}_s^y}\|_2^2$  in equation 17, we get the following:

$$\begin{aligned} \|\mathbf{y} - \mathbf{x}\|_2^2 &\leq 2\|\gamma \nabla_{\mathcal{I} \setminus \mathcal{I}_s^y} f(\mathbf{x})\|_2^2 + 2\|\gamma \nabla_{\mathcal{I} \setminus \mathcal{I}_s^x} f(\mathbf{x})\|_2^2 + \|\gamma \nabla_{\mathcal{I}_s^y} f(\mathbf{x})\|_2^2 \\ &= \|\gamma \nabla_{\mathcal{I} \setminus \mathcal{I}_s^y} f(\mathbf{x})\|_2^2 + \|\gamma \nabla_{\mathcal{I}_s^y} f(\mathbf{x})\|_2^2 + \|\gamma \nabla_{\mathcal{I} \setminus \mathcal{I}_s^y} f(\mathbf{x})\|_2^2 + \|\gamma \nabla_{\mathcal{I} \setminus \mathcal{I}_s^x} f(\mathbf{x})\|_2^2 + \|\gamma \nabla_{\mathcal{I} \setminus \mathcal{I}_s^x} f(\mathbf{x})\|_2^2 \\ &= \|\gamma \nabla_{\mathcal{I}} f(\mathbf{x})\|_2^2 + \|\gamma \nabla_{\mathcal{I} \setminus \mathcal{I}_s^y} f(\mathbf{x})\|_2^2 + \|\gamma \nabla_{\mathcal{I} \setminus \mathcal{I}_s^x} f(\mathbf{x})\|_2^2 + \|\gamma \nabla_{\mathcal{I} \setminus \mathcal{I}_s^x} f(\mathbf{x})\|_2^2 \\ &\leq \|\gamma \nabla_{\mathcal{I}} f(\mathbf{x})\|_2^2 + \|\gamma \nabla_{\mathcal{I}} f(\mathbf{x})\|_2^2 + \|\gamma \nabla_{\mathcal{I}} f(\mathbf{x})\|_2^2 \\ &\leq 3\|\gamma \nabla_{\mathcal{I}} f(\mathbf{x})\|_2^2 \end{aligned}$$

Multiplying by  $\frac{\gamma}{2}(1 - L_s\gamma)$  one would get the result.  $\square$

#### A.4 PROOF OF COROLLARY 2:

*Proof.* According to (16), one can write the following:

$$\begin{aligned} \frac{\gamma}{2}(1 - \gamma L_s)\|\nabla_{\mathcal{I} \setminus \mathcal{I}_s^x} f(\mathbf{x})\|_2^2 + \gamma(1 - \frac{\gamma L_s}{2})\|\nabla_{\mathcal{I}_s^x \cap \mathcal{I}_s^y} f(\mathbf{x})\|_2^2 + \frac{\gamma}{2}\|\nabla_{\mathcal{I} \setminus \mathcal{I}_s^y} f(\mathbf{x})\|_2^2 &\leq f(\mathbf{x}) - f(\mathbf{y}) \\ \gamma(1 - \frac{\gamma L_s}{2})\|\nabla_{\mathcal{I}_s^x \cap \mathcal{I}_s^y} f(\mathbf{x})\|_2^2 + \frac{\gamma}{2}\|\nabla_{\mathcal{I} \setminus \mathcal{I}_s^y} f(\mathbf{x})\|_2^2 &\leq f(\mathbf{x}) - f(\mathbf{y}) \\ \frac{\gamma}{2}\|\nabla_{\mathcal{I}_s^x \cap \mathcal{I}_s^y} f(\mathbf{x})\|_2^2 + \frac{\gamma}{2}\|\nabla_{\mathcal{I} \setminus \mathcal{I}_s^y} f(\mathbf{x})\|_2^2 &\leq f(\mathbf{x}) - f(\mathbf{y}) \\ \frac{\gamma}{2}\|\nabla_{\mathcal{I}_s^x} f(\mathbf{x})\|_2^2 &\leq f(\mathbf{x}) - f(\mathbf{y}) \end{aligned} \tag{18}$$

where the second inequality follows from the fact that  $\frac{\gamma}{2}(1 - \gamma L_s)$  is nonnegative and one can remove  $\gamma(1 - \frac{\gamma L_s}{2})\|\nabla_{\mathcal{I} \setminus \mathcal{I}_s^y} f(\mathbf{x})\|_2^2$  from the left hand side. The third inequality follows the fact that  $\gamma(1 - \frac{\gamma L_s}{2}) \geq \frac{\gamma}{2}$  when  $0 < \gamma \leq \frac{1}{L_s}$ .  $\square$

#### A.5 PROOF OF COROLLARY 3:

*Proof.* From Corollary 2 one can write the following:

$$\frac{\gamma}{2}\|\nabla_{\mathcal{I}_s^k} f(\mathbf{x}^k)\|_2^2 \leq f(\mathbf{x}^k) - f(\mathbf{x}^{k+1}), \quad k \geq 0$$

which means  $f(\mathbf{x}^k) \geq f(\mathbf{x}^{k+1})$ . Then,  $(f(\mathbf{x}^k))_{k \geq 0}$  is a nonincreasing sequence. Since  $f$  is bounded below and  $(f(\mathbf{x}^k))_{k \geq 0}$  is nonincreasing,  $(f(\mathbf{x}^k))_{k \geq 0}$  is a monotone sequence and converges. Now suppose  $\mathbf{x}^*$  is an accumulation point of  $(\mathbf{x}^k)_{k \geq 0}$ . Thus, there exists a subsequence  $(\mathbf{x}^{k_j})_{k_j \geq 0}$  of  $(\mathbf{x}^k)_{k \geq 0}$  converging to  $\mathbf{x}^*$ . Differentiability of  $f$  implies its continuity and its continuity implies  $(f(\mathbf{x}^{k_j}))_{k_j \geq 0} \rightarrow f(\mathbf{x}^*)$ . Now, using the fact that  $(f(\mathbf{x}^k))_{k \geq 0}$  is nonincreasing, one can write  $f(\mathbf{x}^*) \leq f(\mathbf{x}^{k_j})$  for all  $k_j \geq 0$ . Thus,  $f(\mathbf{x}^*) \leq f(\mathbf{x}^k)$  for all  $k \geq 0$  otherwise we get a contradiction. Since,  $(f(\mathbf{x}^k))_{k \geq 0}$  is monotone and has a convergent subsequence, it converges to the limit point of its subsequence, i.e.,  $(f(\mathbf{x}^k))_{k \geq 0} \rightarrow f(\mathbf{x}^*)$ .  $\square$

## A.6 PROOF OF THEOREM 2:

*Proof.* Fix an arbitrary constant  $\gamma \in (0, \frac{1}{L_s}]$ . Consider  $\|\tilde{\mathbf{x}}\|_0 = s$  first. In this case,  $\|\tilde{\mathbf{x}}\|_0 = s$ . Consequently,  $\mathcal{I}_s^{\tilde{\mathbf{x}}}$  is unique and is given by  $\text{supp}(\tilde{\mathbf{x}})$ . Also,  $\min(|\tilde{x}_i| : i \in \mathcal{I}_s^{\tilde{\mathbf{x}}}) > 0$ . Define  $\delta_1 := \frac{\min(|\tilde{x}_i| : i \in \mathcal{I}_s^{\tilde{\mathbf{x}}})}{2} > 0$ . Due to the continuity of min function and uniqueness of  $\mathcal{I}_s^{\tilde{\mathbf{x}}}$  which is equal to  $\text{supp}(\tilde{\mathbf{x}})$ , there exists a neighborhood  $\mathcal{N}_1$  of  $\tilde{\mathbf{x}}$  such that  $\min(|x_i| : i \in \mathcal{I}_s^{\tilde{\mathbf{x}}}) > \frac{\min(|\tilde{x}_i| : i \in \mathcal{I}_s^{\tilde{\mathbf{x}}})}{2}$  for all  $\mathbf{x}$  in  $\mathcal{N}_1 := \{\mathbf{x} \in \mathbb{R}^n \mid \|\mathbf{x} - \tilde{\mathbf{x}}\|_2 < \delta_1\}$ . Using uniqueness of  $\mathcal{I}_s^{\tilde{\mathbf{x}}}$  one can define  $h(\mathbf{x})$  as the following:

$$h(\mathbf{x}) := \max(|x_j - \gamma \nabla_j f(\mathbf{x})| : j \notin \mathcal{I}_s^{\tilde{\mathbf{x}}}) - \min(|x_i - \gamma \nabla_i f(\mathbf{x})| : i \in \mathcal{I}_s^{\tilde{\mathbf{x}}}).$$

Moreover,  $\mathcal{I}_s^{\tilde{\mathbf{x}}} = \text{supp}(\tilde{\mathbf{x}})$  implies  $\nabla_{\mathcal{I}_s^{\tilde{\mathbf{x}}}} f(\tilde{\mathbf{x}}) = 0$ ,  $\tilde{\mathbf{x}}_{(\mathcal{I}_s^{\tilde{\mathbf{x}}})^c} = 0$ , and  $h(\tilde{\mathbf{x}}) > 0$  where

$$h(\tilde{\mathbf{x}}) = \max(|\tilde{x}_j - \gamma \nabla_j f(\tilde{\mathbf{x}})| : j \notin \mathcal{I}_s^{\tilde{\mathbf{x}}}) - \min(|\tilde{x}_i - \gamma \nabla_i f(\tilde{\mathbf{x}})| : i \in \mathcal{I}_s^{\tilde{\mathbf{x}}}) > 0.$$

Let  $\beta_1 := h(\tilde{\mathbf{x}})$  and  $\nu := \frac{3\beta_1^2}{32\gamma} > 0$ . Due to the continuity of  $\nabla f$ , min, and max functions,  $h(\mathbf{x})$  is a continuous function and there exists  $\delta_2 > 0$  and a neighborhood  $\mathcal{N}_2 = \{\mathbf{x} \in \mathbb{R}^n \mid \|\mathbf{x} - \tilde{\mathbf{x}}\|_2 < \delta_2\}$  such that  $h(\mathbf{x}) > \frac{h(\tilde{\mathbf{x}})}{2}$ . Let  $\mathcal{N} = \{\mathbf{x} \in \mathbb{R}^n \mid \|\mathbf{x} - \tilde{\mathbf{x}}\|_2 < \delta\}$  where  $\delta = \min(\delta_1, \delta_2) > 0$ . Thus, for all  $\mathbf{x} \in \mathcal{N} \cap C_s$ , one has  $\|\mathbf{x}\|_0 = s$ ,  $\mathcal{I}_s^{\mathbf{x}} = \text{supp}(\mathbf{x}) = \text{supp}(\tilde{\mathbf{x}})$  and

$$\max(|x_j - \gamma \nabla_j f(\mathbf{x})| : j \notin \mathcal{I}_s^{\mathbf{x}}) - \min(|x_i - \gamma \nabla_i f(\mathbf{x})| : i \in \mathcal{I}_s^{\mathbf{x}}) \geq \frac{\beta_1}{2}.$$

Fix an arbitrary  $\mathbf{x} \in \mathcal{N} \cap C_s$ . Then, for any  $\mathbf{y} \in H_s(\mathbf{x} - \gamma \nabla f(\mathbf{x}))$  and any  $\mathcal{I}_s^{\mathbf{y}}$  there exist two indices  $r \in \text{Argmin}\{|x_i - \gamma \nabla_i f(\mathbf{x})| : i \in \mathcal{I}_s^{\mathbf{x}}\}$  and  $t \in \text{Argmin}\{|x_j - \gamma \nabla_j f(\mathbf{x})| : j \notin \mathcal{I}_s^{\mathbf{x}}\}$  such that  $r \notin \mathcal{I}_s^{\mathbf{y}}$  and  $t \in \mathcal{I}_s^{\mathbf{y}}$ . Clearly,  $r \in \mathcal{I}_s^{\mathbf{x}}$  and  $t \notin \mathcal{I}_s^{\mathbf{x}}$ . Recall that  $\mathcal{I} := \mathcal{I}_s^{\mathbf{x}} \cup \mathcal{I}_s^{\mathbf{y}}$ . Thus,  $r \in \mathcal{I} \setminus \mathcal{I}_s^{\mathbf{y}}$  and  $t \in \mathcal{I} \setminus \mathcal{I}_s^{\mathbf{x}}$ . Thus, one has the following:

$$0 \leq |x_r - \gamma \nabla_r f(\mathbf{x})| \leq |x_t - \gamma \nabla_t f(\mathbf{x})| - \frac{\beta_1}{2} = \gamma |\nabla_t f(\mathbf{x})| - \frac{\beta_1}{2} \leq \gamma |\nabla_t f(\mathbf{x})| - \frac{\beta_1}{4}$$

where we used the fact that  $x_t = 0$ . Observe that the above implies  $\gamma |\nabla_t f(\mathbf{x})| \leq \frac{\beta_1}{2}$ . Therefore, one can write the following:

$$0 \leq |x_r - \gamma \nabla_r f(\mathbf{x})|^2 \leq (\gamma |\nabla_t f(\mathbf{x})| - \frac{\beta_1}{4})^2 = (\gamma |\nabla_t f(\mathbf{x})|)^2 - \frac{\beta_1}{2} (\gamma |\nabla_t f(\mathbf{x})|) + \frac{\beta_1^2}{16} \leq (\gamma |\nabla_t f(\mathbf{x})|)^2 - \frac{3}{16} \beta_1^2$$

According to (14) for all  $i \in \mathcal{I} \setminus \mathcal{I}_s^{\mathbf{y}}$  with  $i \neq r$  and for all  $j \in \mathcal{I} \setminus \mathcal{I}_s^{\mathbf{x}}$  with  $j \neq t$ , one has  $|x_i - \gamma \nabla_i f(\mathbf{x})| \leq |\nabla_j f(\mathbf{x})|$ . Also, according to (15) one can write the following:

$$\|\mathbf{x}_{\mathcal{I} \setminus \mathcal{I}_s^{\mathbf{y}}} - \gamma \nabla_{\mathcal{I} \setminus \mathcal{I}_s^{\mathbf{y}}} f(\mathbf{x})\|_2^2 \leq \|\gamma \nabla_{\mathcal{I} \setminus \mathcal{I}_s^{\mathbf{x}}} f(\mathbf{x})\|_2^2 - \frac{3}{16} \beta_1^2.$$

Therefore, using (16) and applying the same step as the we did for the last step of proof of Theorem 1 one can write the following:

$$\begin{aligned} f(\mathbf{y}) &\leq f(\mathbf{x}) - \gamma(1 - \frac{\gamma L_s}{2}) \|\nabla_{\mathcal{I}_s^{\mathbf{y}}} f(\mathbf{x})\|_2^2 + \frac{1}{2\gamma} (\|\gamma \nabla_{\mathcal{I} \setminus \mathcal{I}_s^{\mathbf{x}}} f(\mathbf{x})\|_2^2 - \frac{3}{16} \beta_1^2) - \frac{\gamma}{2} \|\nabla_{\mathcal{I} \setminus \mathcal{I}_s^{\mathbf{y}}} f(\mathbf{x})\|_2^2 \\ &\leq f(\mathbf{x}) - \frac{\gamma}{2} (1 - \gamma L_s) \|\nabla_{\mathcal{I}_s^{\mathbf{x}} \cup \mathcal{I}_s^{\mathbf{y}}} f(\mathbf{x})\|_2^2 - \frac{3}{32} \beta_1^2 \\ &\leq f(\mathbf{x}) - \nu \end{aligned}$$

where we used  $\nu := \frac{3\beta_1^2}{32\gamma} > 0$ .

Consider  $\|\tilde{\mathbf{x}}\|_0 < s$  next. In this case,  $\text{supp}(\tilde{\mathbf{x}})$  is a proper subset of any  $\mathcal{I}_s^{\tilde{\mathbf{x}}}$ , i.e.,  $\text{supp}(\tilde{\mathbf{x}}) \subset \mathcal{I}_s^{\tilde{\mathbf{x}}}$ . Hence,

$$\min(|\tilde{x}_i| : i \in \mathcal{I}_s^{\tilde{\mathbf{x}}}) = 0, \quad \forall \mathcal{I}_s^{\tilde{\mathbf{x}}}; \text{ and } \max(|\tilde{x}_j - \gamma \nabla_j f(\tilde{\mathbf{x}})| : j \notin \text{supp}(\tilde{\mathbf{x}})) > 0. \quad (19)$$

Let  $\|\tilde{\mathbf{x}}\|_0 = d < s$ . Since  $\|\tilde{\mathbf{x}}\|_0 = d < s$ , there are  $\binom{n-d}{s-d}$  sets of  $\mathcal{I}_s^{\tilde{\mathbf{x}}}$ . The elements of gradients over these sets of  $\mathcal{I}_s^{\tilde{\mathbf{x}}}$  are either zero or nonzero. Thus, define the following two (finite) families of  $\mathcal{I}_s^{\tilde{\mathbf{x}}}$ 's which constitute a disjoint union of all  $\mathcal{I}_s^{\tilde{\mathbf{x}}}$ :

$$\mathbb{I}_1 = \{\mathcal{I}_s^{\tilde{\mathbf{x}}} \mid \nabla_{\mathcal{I}_s^{\tilde{\mathbf{x}}}} f(\tilde{\mathbf{x}}) \neq 0\}, \quad \text{and} \quad \mathbb{I}_2 = \{\mathcal{I}_s^{\tilde{\mathbf{x}}} \mid \nabla_{\mathcal{I}_s^{\tilde{\mathbf{x}}}} f(\tilde{\mathbf{x}}) = 0\}.$$

Clearly,  $\mathbb{I}_1$  is nonempty because (19) implies that there exists an  $\mathcal{I}_s^{\tilde{\mathbf{x}}}$  that contains  $j \in \text{Argmin}\{|x_j - \gamma \nabla_j f(\mathbf{x})| : j \notin \text{supp}(\tilde{\mathbf{x}})\}$  such that  $|\gamma \nabla_j f(\mathbf{x})| \neq 0$ . If  $\mathbb{I}_2$  is empty, define

$$\beta_{2,1} := \min \left( \|\gamma \nabla_{\mathcal{I}_s^{\tilde{\mathbf{x}}}} f(\tilde{\mathbf{x}})\| \mid \mathcal{I}_s^{\tilde{\mathbf{x}}} \in \mathbb{I}_1 \right)$$

and let  $\beta_2 := \beta_{2,1} > 0$ . If  $\mathbb{I}_2$  is nonempty, then for any  $\mathcal{I}_s^{\tilde{\mathbf{x}}} \in \mathbb{I}_2$ , we have,

$$0 = \min \left( |\tilde{x}_i - \gamma \nabla_i f(\tilde{\mathbf{x}})| : i \in \mathcal{I}_s^{\tilde{\mathbf{x}}} \right) < \max \left( |\tilde{x}_j - \gamma \nabla_j f(\tilde{\mathbf{x}})| : j \notin \mathcal{I}_s^{\tilde{\mathbf{x}}} \right)$$

because  $\text{supp}(\tilde{\mathbf{x}}) \subset \mathcal{I}_s^{\tilde{\mathbf{x}}}$ . If  $\mathbb{I}_2$  is empty, we let  $\beta_2 := \beta_{2,1} > 0$ ; otherwise, define

$$\beta_{2,2} := \min \left( \max \left( |\tilde{x}_j - \gamma \nabla_j f(\tilde{\mathbf{x}})| : j \notin \mathcal{I}_s^{\tilde{\mathbf{x}}} \right) - \min \left( |\tilde{x}_i - \gamma \nabla_i f(\tilde{\mathbf{x}})| : i \in \mathcal{I}_s^{\tilde{\mathbf{x}}} \right) \mid \mathcal{I}_s^{\tilde{\mathbf{x}}} \in \mathbb{I}_2 \right) > 0$$

and  $\beta := \min(\beta_{2,1}, \beta_{2,2}) > 0$ .

Based on emptiness or non-emptiness of  $\mathbb{I}_2$  we consider two sub-cases as follows:

(i) Suppose  $\mathbb{I}_2$  is empty. For this case define  $\nu := \frac{\beta_2^2}{8\gamma} > 0$ . Similar to case  $\|\tilde{\mathbf{x}}\|_0 = s$ , by observing the fact that  $\min(|\tilde{x}_i| : i \in \text{supp}(\tilde{\mathbf{x}})) > 0$  and using the continuity of  $\nabla f(\cdot)$  and considering that  $\beta_2 = \min(\|\gamma \nabla_{\mathcal{I}_s^{\tilde{\mathbf{x}}}} f(\tilde{\mathbf{x}})\| \mid \mathcal{I}_s^{\tilde{\mathbf{x}}} \in \mathbb{I}_1)$ , one can show that there exists a neighborhood  $\mathcal{N}$  of  $\tilde{\mathbf{x}}$  such that for all  $\mathbf{x} \in \mathcal{N} \cap C_s$ ,  $\|\nabla_{\mathcal{I}_s^{\tilde{\mathbf{x}}}} f(\mathbf{x})\| \geq \frac{\beta_2}{2\gamma}$  for any  $\mathcal{I}_s^{\tilde{\mathbf{x}}} \in \mathbb{I}_1$ . Also, for all  $\mathbf{x} \in \mathcal{N} \cap C_s$ ,  $\text{supp}(\mathbf{x}) = \text{supp}(\tilde{\mathbf{x}})$ , and  $\mathcal{I}_s^{\mathbf{x}} = \mathcal{I}_s^{\tilde{\mathbf{x}}}$  for some  $\mathcal{I}_s^{\tilde{\mathbf{x}}}$ . Therefore, for all  $\mathbf{x} \in \mathcal{N} \cap C_s$  and any  $\mathcal{I}_s^{\tilde{\mathbf{x}}}, \mathcal{I}_s^{\tilde{\mathbf{x}}} \in \mathbb{I}_1$  and  $\|\nabla_{\mathcal{I}_s^{\tilde{\mathbf{x}}}} f(\mathbf{x})\| \geq \frac{\beta_2}{2\gamma}$ . Hence, following Corollary 2 one can write the following for all  $\mathbf{x} \in \mathcal{N} \cap C_s$  and any  $\mathbf{y} \in H_s(\mathbf{x} - \gamma \nabla f(\mathbf{x}))$ :

$$f(\mathbf{x}) - f(\mathbf{y}) \geq \frac{\gamma}{2} \|\nabla_{\mathcal{I}_s^{\tilde{\mathbf{x}}}} f(\mathbf{x})\|_2^2 \geq \frac{\beta_2^2}{8\gamma} = \nu$$

(ii) Suppose  $\mathbb{I}_2$  is nonempty. Let  $\nu := \frac{3\beta_1^2}{32\gamma} > 0$ . In this case there exists a neighborhood  $\mathcal{N}$  of  $\tilde{\mathbf{x}}$  such that for all  $\mathbf{x} \in \mathcal{N} \cap C_s$ ,  $\text{supp}(\mathbf{x}) = \text{supp}(\tilde{\mathbf{x}})$ , each  $\mathcal{I}_s^{\mathbf{x}}$  equals to some  $\mathcal{I}_s^{\tilde{\mathbf{x}}}$ ,  $\|\nabla_{\mathcal{I}_s^{\tilde{\mathbf{x}}}} f(\mathbf{x})\| \geq \frac{\beta_{2,1}}{2\gamma}$  for every  $\mathcal{I}_s^{\tilde{\mathbf{x}}} \in \mathbb{I}_1$ , and for all  $\mathcal{I}_s^{\tilde{\mathbf{x}}} \in \mathbb{I}_2$  one can write the following:

$$\max \left( |x_j - \gamma \nabla_j f(\mathbf{x})| : j \notin \mathcal{I}_s^{\tilde{\mathbf{x}}} \right) - \min \left( |x_i - \gamma \nabla_i f(\mathbf{x})| : i \in \mathcal{I}_s^{\tilde{\mathbf{x}}} \right) \geq \frac{\beta_{2,2}}{2} > 0.$$

Hence, for all  $\mathbf{x} \in \mathcal{N} \cap C_s$  and any  $\mathcal{I}_s^{\mathbf{x}}$ , either  $\mathcal{I}_s^{\mathbf{x}} \in \mathbb{I}_1$  or  $\mathcal{I}_s^{\mathbf{x}} \in \mathbb{I}_2$ . For the former, we see via the same argument for sub-case (i) that for every  $\mathbf{y} \in H_s(\mathbf{x} - \gamma \nabla f(\mathbf{x}))$ ,  $f(\mathbf{x}) - f(\mathbf{y}) \geq \frac{\gamma}{2} \|\nabla_{\mathcal{I}_s^{\tilde{\mathbf{x}}}} f(\mathbf{x})\|_2^2 \geq \frac{\beta_{2,1}^2}{8\gamma} \geq \frac{\beta_2^2}{8\gamma} > \frac{3\beta_2^2}{32\gamma} = \nu$ . For the latter, it follows from the similar argument for the case of  $\|\tilde{\mathbf{x}}\|_0 = s$  that for any  $\mathbf{y} \in H_s(\mathbf{x} - \gamma \nabla f(\mathbf{x}))$ ,  $f(\mathbf{y}) \leq f(\mathbf{x}) - \frac{3\beta_2^2}{32\gamma} = \nu$ . This leads to the desired results.  $\square$

#### A.7 PROOF OF THEOREM 3:

*Proof.* The proof of a) is given in (Beck & Eldar, 2013, Theorem 2.2). To show b) first one needs to show  $\mathbf{x}^*$  is a *HT-stable* stationary point. To show that suppose it is not. Then, it is a *HT-unstable* stationary point. According to Theorem 2, there exist  $\nu > 0$  and a neighborhood  $\mathcal{N}$  of  $\mathbf{x}^*$  such that  $f(\mathbf{y}) \leq f(\mathbf{x}) - \nu$  for all  $\mathbf{x} \in \mathcal{N} \cap C_s$  and any  $\mathbf{y} \in P_{C_s}(\mathbf{x} - \gamma \nabla f(\mathbf{x}))$ . Let  $\mathbf{x} = \mathbf{x}^*$  to get  $f(\mathbf{y}) \leq f(\mathbf{x}^*) - \nu$ . This contradicts our assumption that  $\mathbf{x}^*$  is a global minimizer. Hence,  $\mathbf{x}^*$  is a

*HT-stable* stationary point. Consequently,  $\nabla_{\text{supp}(\mathbf{x}^*)} f(\mathbf{x}^*) = 0$ . Now, let  $\gamma = \frac{1}{L_s}$  and suppose that  $\|\mathbf{x}^*\|_0 < s$ . Since  $\mathbf{x}^*$  is a *HT-stable* point, one can write the following:

$$\min (|x_i^*| : i \in \mathcal{I}_s^*) \geq \gamma \max (|\nabla_j f(\mathbf{x}^*)| : j \notin \text{supp}(\mathbf{x}^*)).$$

Because  $\text{supp}(\mathbf{x}^*)$  is a proper subset of  $\mathcal{I}_s^*$ ,  $\min (|x_i^*| : i \in \mathcal{I}_s^*) = 0$  which implies  $\nabla_{(\text{supp}(\mathbf{x}^*))^c} f(\mathbf{x}^*) = 0$ . Together with  $\nabla_{\text{supp}(\mathbf{x}^*)} f(\mathbf{x}^*) = 0$ , one can conclude  $\nabla f(\mathbf{x}^*) = 0$ . Thus,  $\mathbf{x}^* = \mathbf{x}^* - \gamma \nabla f(\mathbf{x}^*) = P_s(\mathbf{x}^* - \gamma \nabla f(\mathbf{x}^*))$ . Now suppose that  $\|\mathbf{x}^*\|_0 = s$ . Thus,  $\text{supp}(\mathbf{x}^*) = \mathcal{I}_s^*$ . Since  $\mathbf{x}^*$  is a *HT-stable* stationary point  $\nabla_{\mathcal{I}_s^*} f(\mathbf{x}^*) = 0$  and one can write the following:

$$\min (|x_i^* - \gamma \nabla_i f(\mathbf{x}^*)| : i \in \mathcal{I}_s^*) \geq \max (|x_j^* - \gamma \nabla_j f(\mathbf{x}^*)| : j \notin \mathcal{I}_s^*)$$

which implies the following that is definition of HT operator in Definition 5:

$$|x_i^* - \gamma \nabla_i f(\mathbf{x}^*)| \geq |x_j^* - \gamma \nabla_j f(\mathbf{x}^*)| \quad \forall i \in \mathcal{I}_s^*, j \notin \mathcal{I}_s^*.$$

Thus,  $\mathbf{x}^* \in P_s(\mathbf{x}^* - \gamma \nabla f(\mathbf{x}^*))$ .  $\square$

#### A.8 PROOF OF THEOREM 4:

*Proof.* Let  $\gamma \in (0, \frac{1}{L_s}]$ . Since  $\mathbf{x}^*$  is an accumulation point, there exists a subsequence  $(\mathbf{x}^{k_j})$  of  $(\mathbf{x}^k)$  converging to  $\mathbf{x}^*$ . Also, there exists a subsequence  $(\mathbf{x}^{k_{j_l}})$  of  $(\mathbf{x}^{k_j})$  converging to  $\mathbf{x}^*$  such that  $\mathcal{I}_s^{\mathbf{x}^{k_{j_l}}}$  is a constant set for all  $k$ . Let  $\mathcal{J} = \mathcal{I}_s^{\mathbf{x}^{k_{j_l}}}$ . According to Corollary 2 one can write the following:

$$\frac{\gamma}{2} \|\nabla_{\mathcal{J}} f(\mathbf{x}^{k_{j_l}})\|_2^2 \leq f(\mathbf{x}^{k_{j_l}}) - f(\mathbf{x}^{k_{j_l}+1}).$$

We can sum over  $l$  to get the following:

$$\frac{\gamma}{2} \sum_{l=1}^{\infty} \|\nabla_{\mathcal{J}} f(\mathbf{x}^{k_{j_l}})\|_2^2 \leq \sum_{l=1}^{\infty} (f(\mathbf{x}^{k_{j_l}}) - f(\mathbf{x}^{k_{j_l}+1})) \leq \sum_{k=0}^{\infty} (f(\mathbf{x}^k) - f(\mathbf{x}^{k+1}))$$

where the second inequality follows the fact that  $(\mathbf{x}^{k_{j_l}})$  is a subsequence of  $(\mathbf{x}^k)$  and  $(f(\mathbf{x}^k))$  is a nonincreasing sequence. Thus,  $\frac{\gamma}{2} \sum_{l=1}^{\infty} \|\nabla_{\mathcal{J}} f(\mathbf{x}^{k_{j_l}})\|_2^2 \leq f(\mathbf{x}^0) - f(\mathbf{x}^{k+1})$ . By letting  $l$  go to infinity, the right hand side would be bounded since  $f$  is bounded below on  $C_s$ . Therefore,  $\nabla_{\mathcal{J}} f(\mathbf{x}^*) = 0$ . Notice that  $\mathbf{x}^{k_{j_l}} = 0$  for all  $k_{j_l}$ . Since  $\mathcal{J} = \mathcal{I}_s^{\mathbf{x}^{k_{j_l}}}$ , one has  $\mathbf{x}_{\mathcal{J}^c}^{k_{j_l}} = 0$  for all  $k_{j_l}$ . On the other hand,  $\mathbf{x}^{k_{j_l}} \rightarrow \mathbf{x}^*$  so  $\mathbf{x}_{\mathcal{J}^c}^* = 0$ . This shows  $\text{supp}(\mathbf{x}^*) \subseteq \mathcal{J}$ . Since  $\text{supp}(\mathbf{x}^*) \subseteq \mathcal{J}$ , one has  $\nabla_{\text{supp}(\mathbf{x}^*)} f(\mathbf{x}^*) = 0$ . Now suppose to the contrary that  $\mathbf{x}^*$  is a *HT-unstable*. Then, according to Theorem 2, there exists a constant  $\nu > 0$  and a neighborhood  $\mathcal{N}$  of  $\mathbf{x}^*$  such that  $f(\mathbf{y}) \leq f(\mathbf{x}) - \nu$  for all  $\mathbf{x} \in \mathcal{N} \cap C_s$  and any  $\mathbf{y} \in H_s(\mathbf{x} - \gamma \nabla f(\mathbf{x}))$ . Thus, there exists  $k \geq N$  such that  $(\mathbf{x}^{k_{j_l}}) \in \mathcal{N} \cap C_s$  and one can write  $f(\mathbf{x}^{k_{j_l}+1}) \leq f(\mathbf{x}^{k_{j_l}}) - \nu$ . Then one can sum over  $j$ 's to get  $f(\mathbf{x}^{k_j+1}) - f(\mathbf{x}^{k_1}) \leq -\nu j$ . By letting  $j$  go to infinity, we get  $f(\mathbf{x}^{k_j+1}) \rightarrow \infty$  which implies  $f(\mathbf{x}^k) \rightarrow \infty$ . This contradicts the boundedness of  $f$  from below. Hence,  $\mathbf{x}^*$  is a *HT-stable* stationary point.  $\square$

#### A.9 PROOF OF COROLLARY 4:

*Proof.* Let  $\mathbf{x}^*$  be a *HT-unstable* point associated with some  $\gamma \in (0, \frac{1}{L_s}]$ . Then, according to Theorem 2, there exists a constant  $\nu > 0$  and a neighborhood  $\mathcal{N}$  of  $\mathbf{x}^*$  such that  $f(\mathbf{y}) \leq f(\mathbf{x}) - \nu$  for all  $\mathbf{x} \in \mathcal{N} \cap C_s$  and any  $\mathbf{y} \in H_s(\mathbf{x} - \gamma \nabla f(\mathbf{x}))$ . Let  $\mathbf{x} = \mathbf{x}^*$  and  $\alpha = f(\mathbf{x}^*)$ . Thus,  $S = \{\mathbf{x} \in C_s | f(\mathbf{x}) \leq f(\mathbf{x}^*) = \alpha\}$  is nonempty since  $f(\mathbf{y}) \leq f(\mathbf{x}^*) - \nu < f(\mathbf{x}^*)$ . Also, let  $(\mathbf{x}^k)_{k \geq 0}$  be an IHT sequence with  $\mathbf{x}^0 = \mathbf{y}$ . Since  $(f(\mathbf{x}^k))_{k \geq 0}$  is nonincreasing,  $(\mathbf{x}^k)_{k \geq 0}$  is in  $S$ . Because  $S$  is bounded, there exists a subsequence  $(\mathbf{x}^{k_j})$  of  $(\mathbf{x}^k)$  converging to  $\tilde{\mathbf{x}}^*$ . Since  $\tilde{\mathbf{x}}^*$  is an accumulation point of the IHT sequence, by virtue of Theorem 4 it is a *HT-stable* stationary point. Hence, by the continuity of  $f$ , one has  $f(\mathbf{x}^{k_j}) \rightarrow f(\tilde{\mathbf{x}}^*) \leq \alpha < f(\mathbf{x}^*)$  which is the desired result.  $\square$

## A.10 PROOF OF COROLLARY 5:

*Proof.* Fix an arbitrary  $0 < \gamma(0, \frac{1}{L_s}]$ . By virtue of the proof for Corollary 4 any IHT sequence  $(\mathbf{x}^k)_{k \geq 0}$  is bounded and attains an accumulation point. Suppose A.1 holds. To show the convergence of  $(\mathbf{x}^k)_{k \geq 0}$ , we show that  $(\mathbf{x}^k)_{k \geq 0}$  has a unique accumulation point. Note that due to Theorem 4 any accumulation point of IHT sequence is *HT-stable* stationary point. Now, suppose the accumulation is not unique. Then,  $(\mathbf{x}^k)_{k \geq 0}$  has (at least) two distinct accumulation points denoted by  $\mathbf{x}^*$  and  $\mathbf{y}^*$ , respectively. And, there exist two subsequences  $(\mathbf{x}^{k_j})$  and  $(\mathbf{x}^{k_l})$  of  $(\mathbf{x}^k)$  converging to  $\mathbf{x}^*$  and  $\mathbf{y}^*$ , respectively. Since  $f$  is continuous,  $(f(\mathbf{x}^{k_j}))$  and  $(f(\mathbf{x}^{k_l}))$  converge to  $f(\mathbf{x}^*)$  and  $f(\mathbf{y}^*)$ , respectively. However, by invoking Corollary 3, one can observe that the sequence of the objective function value  $(f(\mathbf{x}^k))_{k \geq 0}$  converges. Thus  $(f(\mathbf{x}^k))_{k \geq 0}$  converges to both  $f(\mathbf{x}^*)$  and  $f(\mathbf{y}^*)$ . This implies that  $f(\mathbf{x}^*) = f(\mathbf{y}^*)$ , a contradiction. Hence,  $(\mathbf{x}^k)_{k \geq 0}$  has exactly one accumulation point and is convergent. The convergence results under A.2 follows from  $\|\mathbf{x}^{k+1} - \mathbf{x}^k\|_2 \rightarrow 0$  as  $k \rightarrow \infty$  when  $0 < \gamma < \frac{1}{L_s}$  (Moré & Sorensen, 1983, Lemma 4.10).  $\square$

## A.11 PROOF OF COROLLARY 6:

*Proof.* According to Theorem 2, there exists a constant  $\nu > 0$  and a neighborhood  $\mathcal{N}$  of  $\mathbf{x}^*$  such that  $f(\mathbf{y}) \leq f(\mathbf{x}) - \nu$  for all  $\mathbf{x} \in \mathcal{N} \cap C_s$  and any  $\mathbf{y} \in H_s(\mathbf{x} - \gamma \nabla f(\mathbf{x}))$ . Then every IHT sequence with an arbitrary  $\mathbf{x}^0 \in C_s$  has finitely many points in  $\mathcal{N} \cap C_s$ . Otherwise there exists  $\mathbf{x}^0 \in C_s$  and an IHT sequence starting from  $\mathbf{x}^0$  such that for all  $N \in \mathbb{N}$ , there exists  $k \geq N$  for which  $\mathbf{x}^k \in \mathcal{N} \cap C_s$ . Then, there exists a subsequence  $(\mathbf{x}^{k_j})$  of  $(\mathbf{x}^k)$  that is in  $\mathcal{N} \cap C_s$ . Thus,  $f(\mathbf{x}^{k_{j+1}}) \leq f(\mathbf{x}^{k_j}) - \nu$  for all  $j \geq 1$ . Then one can sum over  $j$ 's to get  $f(\mathbf{x}^{k_{j+1}}) - f(\mathbf{x}^{k_1}) \leq -\nu j$ . By letting  $j$  go to infinity, we get  $f(\mathbf{x}^{k_{j+1}}) \rightarrow \infty$  which implies  $f(\mathbf{x}^k) \rightarrow \infty$ . This contradicts the boundedness of  $f$  from below. Hence, the claim.  $\square$

## A.12 PROOF OF PROPOSITION 1:

*Proof.* Fix an arbitrary constant  $\gamma \in (0, \frac{1}{L_s}]$ . When  $\mathbf{x}^*$  is strictly *HT-stable* point,  $\|\mathbf{x}^*\|_0 = s$ . Thus,  $\min(|x_i^*| : i \in \mathcal{I}_s^{\mathbf{x}^*}) > 0$ . Since  $\|\mathbf{x}^*\|_0 = s$ ,  $\mathcal{I}_s^{\mathbf{x}^*}$  is unique and is given by  $\text{supp}(\mathbf{x}^*)$ . Define  $\delta_1 := \frac{\min(|x_i^*| : i \in \mathcal{I}_s^{\mathbf{x}^*})}{2} > 0$ . Due to the continuity of min function and uniqueness of  $\mathcal{I}_s^{\mathbf{x}^*}$ , we know that there exists a neighborhood  $\mathcal{N}_1$  of  $\mathbf{x}$  such that  $\min(|x_i| : i \in \mathcal{I}_s^{\mathbf{x}}) > \frac{\min(|x_i^*| : i \in \mathcal{I}_s^{\mathbf{x}^*})}{2}$  for all  $\mathbf{x}$  in  $\mathcal{N}_1 := \{\mathbf{x} \in \mathbb{R}^n \mid \|\mathbf{x} - \mathbf{x}^*\|_2 < \delta_1\}$ . Also, using uniqueness of  $\mathcal{I}_s^{\mathbf{x}^*}$  one can define  $h(\mathbf{x})$  as the following:

$$h(\mathbf{x}) := \min(|x_i - \gamma \nabla_i f(\mathbf{x})| : i \in \mathcal{I}_s^{\mathbf{x}^*}) - \max(|x_j - \gamma \nabla_j f(\mathbf{x})| : j \notin \mathcal{I}_s^{\mathbf{x}^*}).$$

Moreover,  $\mathcal{I}_s^{\mathbf{x}^*} = \text{supp}(\mathbf{x}^*)$  implies  $\nabla_{\mathcal{I}_s^{\mathbf{x}^*}} f(\mathbf{x}^*) = 0$ ,  $\mathbf{x}_{(\mathcal{I}_s^{\mathbf{x}^*})^c}^* = 0$ , so  $h(\mathbf{x}^*) > 0$  where

$$h(\mathbf{x}^*) = \min(|x_i - \gamma \nabla_i f(\mathbf{x}^*)| : i \in \mathcal{I}_s^{\mathbf{x}^*}) - \max(|x_j^* - \gamma \nabla_j f(\mathbf{x}^*)| : j \notin \mathcal{I}_s^{\mathbf{x}^*}) > 0.$$

Due to continuity of  $\nabla f$ , min, and max functions,  $h(\mathbf{x})$  is a continuous function and there exists  $\delta_2 > 0$  and a neighborhood  $\mathcal{N}_2 := \{\mathbf{x} \in \mathbb{R}^n \mid \|\mathbf{x} - \mathbf{x}^*\|_2 < \delta_2\}$  such that  $h(\mathbf{x}) > \frac{h(\mathbf{x}^*)}{2}$ . Since  $\min(|x_i^*| : i \in \mathcal{I}_s^{\mathbf{x}^*}) > 0$ ,  $\nabla_{\mathcal{I}_s^{\mathbf{x}^*}} f(\mathbf{x}^*) = 0$ ,  $\mathcal{I}_s^{\mathbf{x}^*}$  is unique, and  $\nabla f$  is continuous there exists  $\delta_3 > 0$  and a neighborhood  $\mathcal{N}_3 := \{\mathbf{x} \in \mathbb{R}^n \mid \|\mathbf{x} - \mathbf{x}^*\|_2 < \delta_3\}$  such that  $\gamma \|\nabla_{\mathcal{I}_s^{\mathbf{x}^*}} f(\mathbf{x}^*)\|_2 < \frac{\min(|x_i^*| : i \in \mathcal{I}_s^{\mathbf{x}^*})}{4}$ . Let  $\mathcal{B} = \{\mathbf{x} \in \mathbb{R}^n \mid \|\mathbf{x} - \mathbf{x}^*\|_2 < \delta\}$  where  $\delta = \min(\delta_1, \delta_2, \delta_3) > 0$ . Thus, for all  $\mathbf{x} \in \mathcal{B} \cap C_s$ , one has  $\|\mathbf{x}\|_0 = s$ ,  $\mathcal{I}_s^{\mathbf{x}} = \text{supp}(\mathbf{x}) = \text{supp}(\mathbf{x}^*)$  and

$$\min(|x_i - \gamma \nabla_i f(\mathbf{x})| : i \in \mathcal{I}_s^{\mathbf{x}}) > \max(|x_j - \gamma \nabla_j f(\mathbf{x})| : j \notin \mathcal{I}_s^{\mathbf{x}}). \quad (20)$$

By observing the fact that  $\mathcal{I}_s^{\mathbf{x}} = \text{supp}(\mathbf{x}^*)$  for all  $\mathbf{x} \in \mathcal{B} \cap C_s$ , let  $\mathcal{S}_{\mathcal{L}}$  be a subspace defined by  $\mathcal{I}_s^{\mathbf{x}}$ . As  $f$  is strictly convex on any  $\mathcal{S}_{\mathcal{J}}$ ,  $f(\mathbf{x}) \geq f(\mathbf{x}^*)$  for all  $\mathbf{x} \in \mathcal{B} \cap C_s$  such that  $\mathbf{x}^*$  is a unique local minimizer of Problem (2) on  $\mathcal{B} \cap C_s$ . Further, in light of 20 we obtain that for any given  $\mathbf{x} \in \mathcal{B} \cap C_s$ ,

$H_s(\mathbf{x} - \gamma \nabla f(\mathbf{y}))$  has a unique solution  $\mathbf{y}$  with  $\text{supp}(\mathbf{y}) = \mathcal{L}$ , and  $\mathbf{y}_{\mathcal{L}} = \mathbf{x}_{\mathcal{L}} - \gamma_{\mathcal{L}} f(\mathbf{x})$ . Hence,  $\mathbf{y} \in \mathcal{S}_{\mathcal{L}}$ . We claim that

$$\|\mathbf{y} - \mathbf{x}^*\|_2 \leq \|\mathbf{x} - \mathbf{x}^*\|_2.$$

Towards this end, we see via  $\mathbf{y} \in \mathcal{S}_{\mathcal{L}}$  and the previous argument that  $f(\mathbf{y}) \geq f(\mathbf{x}^*)$ . Furthermore, since  $\mathbf{y}_{\mathcal{L}} = \mathbf{x}_{\mathcal{L}} - \gamma_{\mathcal{L}} f(\mathbf{x})$ , we deduce from Corollary 2 and  $\mathcal{I}_s^{\mathbf{x}} = \text{supp}(\mathbf{x}^*) = \mathcal{L}$  that

$$\frac{\gamma}{2} \|\nabla_{\mathcal{L}} f(\mathbf{x})\|_2^2 \leq f(\mathbf{x}) - f(\mathbf{y}).$$

Due to the (strict) convexity of  $f$  on  $\mathcal{S}_{\mathcal{L}}$  and  $\text{supp}(\mathbf{x}) = \text{supp}(\mathbf{x}^*) = \mathcal{S}_{\mathcal{L}}$  and one has the following:

$$f(\mathbf{x}^*) \geq f(\mathbf{x}) + \langle \nabla f(\mathbf{x}), \mathbf{x}^* - \mathbf{x} \rangle = f(\mathbf{x}) + \langle \nabla_{\mathcal{L}} f(\mathbf{x}), \mathbf{x}_{\mathcal{L}}^* - \mathbf{x}_{\mathcal{L}} \rangle$$

which yields  $f(\mathbf{x}) - f(\mathbf{x}^*) \leq \langle \nabla_{\mathcal{L}} f(\mathbf{x}), \mathbf{x}_{\mathcal{L}} - \mathbf{x}_{\mathcal{L}}^* \rangle$ . We further have

$$0 \leq f(\mathbf{y}) - f(\mathbf{x}^*) \leq f(\mathbf{x}) - f(\mathbf{x}^*) - \frac{\gamma}{2} \|\nabla_{\mathcal{L}} f(\mathbf{x})\|_2^2 \leq \langle \nabla_{\mathcal{L}} f(\mathbf{x}), \mathbf{x}_{\mathcal{L}} - \mathbf{x}_{\mathcal{L}}^* \rangle - \frac{\gamma}{2} \|\nabla_{\mathcal{L}} f(\mathbf{x})\|_2^2.$$

Using these results, we obtain

$$\begin{aligned} 0 \leq \langle \nabla_{\mathcal{L}} f(\mathbf{x}), \mathbf{x}_{\mathcal{L}} - \mathbf{x}_{\mathcal{L}}^* \rangle - \frac{\gamma}{2} \|\nabla_{\mathcal{L}} f(\mathbf{x})\|_2^2 &= \frac{1}{2\gamma} \left( \|\mathbf{x}_{\mathcal{L}} - \mathbf{x}_{\mathcal{L}}^*\|_2^2 - \|\mathbf{x}_{\mathcal{L}} - \nabla_{\mathcal{L}} f(\mathbf{x}) - \mathbf{x}_{\mathcal{L}}^*\|_2^2 \right) \\ &= \frac{1}{2\gamma} \left( \|\mathbf{x}_{\mathcal{L}} - \mathbf{x}_{\mathcal{L}}^*\|_2^2 - \|\mathbf{y}_{\mathcal{L}} - \mathbf{x}_{\mathcal{L}}^*\|_2^2 \right) \end{aligned}$$

This shows that  $\|\mathbf{y} - \mathbf{x}^*\|_2 \leq \|\mathbf{x} - \mathbf{x}^*\|_2$  thus the claim holds.

In view of the above claim, we deduce via induction that for any  $\mathbf{x}^0 \in \mathcal{B} \cap C_s$ ,  $\mathbf{x}^k \in \mathcal{B} \cap C_s$  for all  $k \in \mathbb{N}$ . Hence, the IHT sequence  $(\mathbf{x}^k)$  is contained in  $\mathcal{B}$  and thus is bounded such that it has an accumulation point. As shown in Theorem 4, all accumulation points  $\tilde{\mathbf{x}}$  of an IHT sequence are *HT-stable* and satisfy  $\nabla_{\text{supp}(\tilde{\mathbf{x}})} f(\tilde{\mathbf{x}}) = 0$  so does any accumulation point  $\hat{\mathbf{x}}$  of  $(\mathbf{x}^k)$ . Since  $(\mathbf{x}^k)$  is contained in  $\mathcal{B} \cap C_s$ ,  $\mathcal{I}_s^{\mathbf{x}^k} = \text{supp}(\mathbf{x}^*)$  for all  $k \geq 0$  and  $\hat{\mathbf{x}}$  satisfies  $\text{supp}(\hat{\mathbf{x}}) = \mathcal{S}_{\mathcal{L}}$  and  $\nabla_{\mathcal{L}} f(\hat{\mathbf{x}}) = 0$ . Thus,  $\hat{\mathbf{x}}_{\mathcal{L}} = \mathbf{x}_{\mathcal{L}}^*$ ; otherwise, due to strict convexity of  $f$ , one can write  $f(\hat{\mathbf{x}}) > f(\mathbf{x}^*) + \langle \nabla_{\mathcal{L}} f(\mathbf{x}^*), \hat{\mathbf{x}}_{\mathcal{L}} - \mathbf{x}_{\mathcal{L}}^* \rangle = f(\mathbf{x}^*)$  and  $f(\mathbf{x}^*) > f(\hat{\mathbf{x}}) + \langle \nabla_{\mathcal{L}} f(\hat{\mathbf{x}}), \mathbf{x}_{\mathcal{L}}^* - \hat{\mathbf{x}}_{\mathcal{L}} \rangle = f(\hat{\mathbf{x}})$  which are impossible. This shows that any IHT sequence  $(\mathbf{x}^k)$  in  $\mathcal{B}$  has exactly one accumulation point given by  $\mathbf{x}^*$  and thus converges to  $\mathbf{x}^*$ .

To show Q-linearly convergence suppose that  $f$  is strongly convex on  $\mathcal{S}_{\mathcal{J}}$  for all index subsets  $\mathcal{J}$  with  $|\mathcal{J}|$ . Then there exists a positive constant  $m_{\mathcal{J}}$  with  $0 < m_{\mathcal{J}} \leq L_s$  such that

$$f(\mathbf{y}) \geq f(\mathbf{x}) + \langle \nabla_{\mathcal{J}} f(\mathbf{x}), \mathbf{y}_{\mathcal{J}} - \mathbf{x}_{\mathcal{J}} \rangle + \frac{m_{\mathcal{J}}}{2} \|\mathbf{y} - \mathbf{x}\|_2^2, \quad \forall \mathbf{y}, \mathbf{x} \in \mathcal{S}_{\mathcal{J}}$$

The prior argument shows that  $\nabla_{\mathcal{J}} f(\mathbf{x}^*) = 0$ . Since  $f$  is strongly convex on  $\mathcal{S}_{\mathcal{J}}$ , we have  $f(\mathbf{y}) \geq f(\mathbf{x}) + \frac{m_{\mathcal{J}}}{2} \|\mathbf{y} - \mathbf{x}\|_2^2$  for all  $\mathbf{y} \in \mathcal{S}_{\mathcal{J}}$ . It follows from the similar argument as before that for every  $\mathbf{x} \in \mathcal{B} \cap C_s$ ,  $H_s(\mathbf{x} - \gamma \nabla f(\mathbf{x}))$  has a unique solution  $\mathbf{x}$  with  $\text{supp}(\mathbf{y}) = \mathcal{L}$  and  $\mathbf{y}_{\mathcal{L}} = \mathbf{x}_{\mathcal{L}} - \gamma_{\mathcal{L}} f(\mathbf{x})$ . Hence,  $\mathbf{y} \in \mathcal{S}_{\mathcal{J}}$ . As a result, we obtain, in view of  $0 < \frac{1}{\gamma} \leq L_s$ ,

$$\begin{aligned} \frac{m_{\mathcal{J}}}{2} \|\mathbf{y} - \mathbf{x}^*\|_2^2 &\leq f(\mathbf{y}) - f(\mathbf{x}^*) = \frac{1}{2\gamma} \left( \|\mathbf{x}_{\mathcal{L}} - \mathbf{x}_{\mathcal{L}}^*\|_2^2 - \|\mathbf{x}_{\mathcal{L}} - \nabla_{\mathcal{L}} f(\mathbf{x}) - \mathbf{x}_{\mathcal{L}}^*\|_2^2 \right) \\ &= \frac{L_s}{2} \left( \|\mathbf{x}_{\mathcal{L}} - \mathbf{x}_{\mathcal{L}}^*\|_2^2 - \|\mathbf{y}_{\mathcal{L}} - \mathbf{x}_{\mathcal{L}}^*\|_2^2 \right) \\ &= \frac{L_s}{2} \left( \|\mathbf{x} - \mathbf{x}^*\|_2^2 - \|\mathbf{y} - \mathbf{x}^*\|_2^2 \right). \end{aligned}$$

This give rise to

$$\|\mathbf{y} - \mathbf{x}^*\|_2^2 \leq \frac{L_s}{L_s + m_{\mathcal{J}}} \|\mathbf{x} - \mathbf{x}^*\|_2^2$$

Obviously, this implies that any IHT sequence  $(\mathbf{x}^k)$  in  $\mathcal{B}$  Q-linearly converges to  $\mathbf{x}^*$ .  $\square$
